# Supplementary material
Source: PubMed Central journal article supplement (PMC8686853)
Supplement: JCOPDF-8-450-s001.pdf [file JCOPDF-8-450-s001.pdf]

**Online Supplement**

**Comparative Effectiveness of Roflumilast and Azithromycin for the Treatment of Chronic Obstructive Pulmonary Disease**

Jenny Lam, MD, PhD<sup>1,2</sup> Ivy Tonnu-Mihara, PharmD<sup>3</sup> Nicholas J. Kenyon, MD, MAS<sup>4,5</sup> Brooks T. Kuhn, MD, MAS<sup>4,5</sup>

<sup>1</sup>Department of Pharmaceutical and Health Economics, School of Pharmacy, University of Southern California, Los Angeles, California, United States

<sup>2</sup> Leonard D. Schaeffer Center for Health Policy and Economics, University of Southern California, Los Angeles, California, United States

<sup>3</sup>Veterans Affairs Long Beach Healthcare System, Long Beach, California, United States

<sup>4</sup>Division of Pulmonary and Critical Care Medicine, School of Medicine, University of California, Davis, Sacramento, California, United States

<sup>5</sup>Veterans Affairs Northern California Healthcare System, Mather, California, United States

Table 1.

| Condition                                    | ICD-9                                                                                                                 | ICD-10                                                                                                                               |
|----------------------------------------------|-----------------------------------------------------------------------------------------------------------------------|--------------------------------------------------------------------------------------------------------------------------------------|
| Alpha-1-antitrypsin deficiency               | 273.4                                                                                                                 | E88.01                                                                                                                               |
| Asthma                                       | 493                                                                                                                   | J45                                                                                                                                  |
| Arrhythmias                                  | 426-427                                                                                                               | I44-I45; I48-I49                                                                                                                     |
| Cancer                                       | 140-165; 170-172; 174-175; 179-184; 186-208; 209.0-209.3; 209.7; 235-239                                              | C00-C26; C30-C41; C43; C4A; C45; C47-C58; C60; C62-C80; C7A; C7B; C81-C97; D37-D49                                                   |
| Cerebral vascular disease                    | 430-438                                                                                                               | G45-G46; I60-I69                                                                                                                     |
| Chronic kidney disease                       | 250.4; 285.21; 403-404; 585.1-585.6; 585.9                                                                            | D63.1; E10.22; E11.22; E13.22; E14.22; I12-I13; N18.1-N18.6; N18.9                                                                   |
| Chronic liver disease                        | 070.22-070.23; 070.32-070.33; 070.44; 070.54; 070.7; 456.0-456.2; 571.0; 571.2-571.6; 571.8-571.9; 572.2-572.4; 572.8 | B18; K70; K72.1; K72.9; K71.1; K71.3; K71.4; K71.5; K71.7; K73; K74; K75.4; K75.81; K76.0; K76.6; K76.7; K76.81; I85.0; I85.1; I86.4 |
| Chronic obstructive pulmonary disease (COPD) | 490-492; 493.20-493.22; 496                                                                                           | J40-J44                                                                                                                              |
| Diabetes mellitus                            | 250                                                                                                                   | E10-E14                                                                                                                              |
| Dyslipidemia                                 | 272                                                                                                                   | E78                                                                                                                                  |
| Heart failure                                | 398.91; 402.01; 402.11; 402.91; 404.01; 404.03; 404.11; 404.13; 404.91; 404.93; 428                                   | I09.81; I11.0; I13.0; I13.2; I50                                                                                                     |
| History of tobacco use                       | 305.1; 649.0; 989.84; V15.82                                                                                          | F17; O99.33; T65.22; Z71.6; Z87.891                                                                                                  |
| HIV/AIDS                                     | 042-044; V08                                                                                                          | B20-B24; Z21                                                                                                                         |
| Hypertension                                 | 401-405                                                                                                               | I10-I13; I15                                                                                                                         |
| Ischemic heart disease                       | 410-412; 414                                                                                                          | I21-I25                                                                                                                              |
| Lung cancer                                  | 162                                                                                                                   | C34                                                                                                                                  |
| Metastatic cancer                            | 196-199; 209                                                                                                          | C77-C80; C7B                                                                                                                         |
| Mood disorders                               | 300.0; 300.4; 311                                                                                                     | F32-F34                                                                                                                              |
| Obstructive sleep apnea                      | 327.23                                                                                                                | G47.33                                                                                                                               |
| Osteoporosis                                 | 733.0                                                                                                                 | M80-M81                                                                                                                              |
| Peripheral vascular disease                  | 440; 443.81; 443.9; 445                                                                                               | I70; I73.9; I75; E10.5; E11.5; E13.5; E14.5                                                                                          |
| Rheumatological/Immune diseases              | 135; 274; 340; 446.0; 446.2-446.5; 446.7; 555-556; 558.4; 558.9; 714; 710.0-710.5; 710.8-710.9                        | D86; G35; K50-K51; K52.3; K52.8; M05-M06; M10; M1A; M30.0-M30.2; M30.8; M31.0; M31.2-M31.9; M32-M34; M35.1-M35.6; M35.8-M35.9        |
